# Supplementary material for: Probing the Functional Impact of Sequence Variation on p53-DNA Interactions Using a Novel Microsphere Assay for Protein-DNA Binding with Human Cell Extracts
Source: PLOS journal article supplement (doi:10.1371/journal.pgen.1000462), 2009-04-30

## A. Create unique bead-sequence combinations

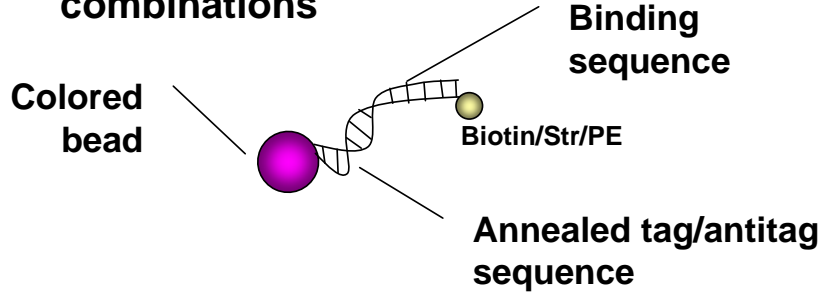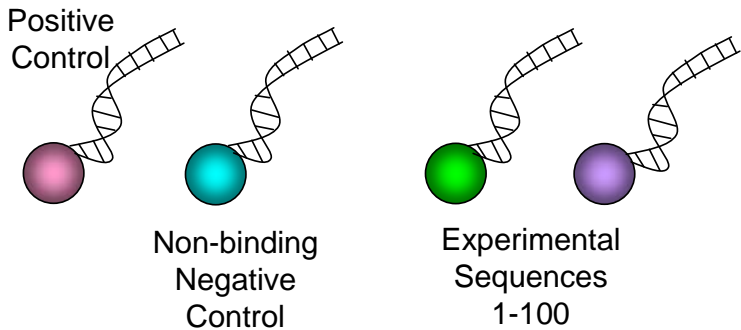

## B. Incubate beads with nuclear extract

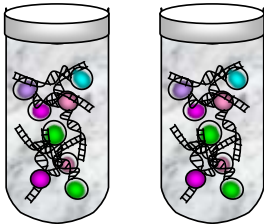

## C. Detect transcription factor

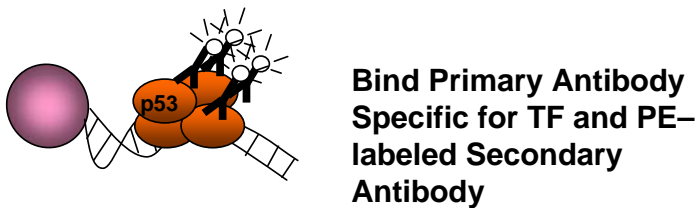

## D. Flow sort beads to detect bead identity and TF signal

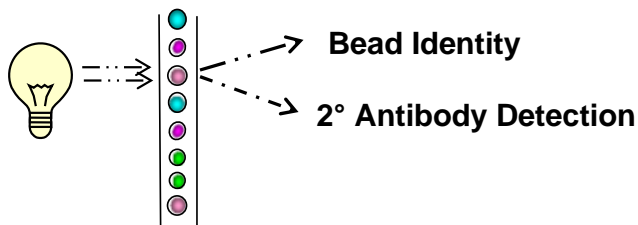

Supplement: S1 (10.1371/journal.pgen.1000462.s001) [file journal.pgen.1000462.s001]
